# Supplementary material for: Identifying potential patient-specific predictors for anterior cruciate ligament reconstruction outcome – a diagnostic in vitro tissue remodeling platform
Source: J Exp Orthop. 2020 Jul 4;7:48. doi: 10.1186/s40634-020-00266-2 (PMC7335379; doi:10.1186/s40634-020-00266-2)
Supplement: Supplementary file 4 — Additional file 4: Table S1. Patient data. [file 40634_2020_266_MOESM4_ESM.xlsx]

## Sheet: Sheet1
Table S-1: patient data
patient number	gender	age (y)	tendon
1	♂	18	semitend.
2	♂	48	semitend.
3	♀	30	semitend.
4	♀	22	semitend.
5	♂	26	semitend.
6	♂	22	semitend.
7	♀	27	semitend.
8	♀	53	semitend.
9	♀	51	semitend.
			gracilis
10	♂	31	semitend.
11	♂	24	semitend.
12	♀	35	semitend.
13	♀	25	semitend.
14	♀	55	semitend.
15	♀	16	gracilis
16	♀	22	semitend.
17	♂	44	semitend.
18	♂	24	semitend.
19	♂	17	semitend.
20	♀	37	gracilis
21	♂	24	semitend.
22	♂	17	semitend.
23	♂	18	semitend.
24	♂	19	semitend.
25	♂	21	semitend.
26	♂	21	semitend.
			gracilis
27	♀	12	gracilis
28	♀	12	semitend.
29	♂	22	gracilis
			semitend.
30	♂	16	semitend.
31	♀	20	semitend.
			gracilis
32	♂	16	semitend.
			gracilis
33	♂	51	gracilis
34	♀	52	gracilis
35	♂	15	gracilis
36	♀	41	semitend.
